1 **Unlocking the potential of historical abundance datasets to study**  
2 **biomass change in flying insects**

3

4 Rebecca S. Kinsella<sup>1</sup>, Chris D. Thomas<sup>1</sup>, Terry J. Crawford<sup>1</sup>, Jane K. Hill<sup>1</sup>, Peter J. Mayhew<sup>1</sup>  
5 and Callum J. Macgregor<sup>1</sup>

6

7 <sup>1</sup>: Department of Biology, University of York, Wentworth Way, York, YO10 5DD

8

9 *Running head: Predicting moth biomass from abundance*

10

11 Corresponding author:

12 Callum J. Macgregor; tel: (+44) 01904 328632; email: [callumjmacgregor@gmail.com](mailto:callumjmacgregor@gmail.com).

13

14 **Abstract**

15

16 1. Insect abundance changes are well-established in some datasets, but far less is  
17 known about how this translates into biomass changes. Moths (Lepidoptera)  
18 provide particularly good opportunities to study trends and drivers of biomass  
19 change at large spatial and temporal scales, given the existence of long-term  
20 abundance datasets for moths. This requires estimation of the body mass of moths  
21 sampled over time, but such data do not currently exist.

22 2. We collected empirical data in 2018 on the forewing length and dry mass of  
23 sampled moths, and used these to train and test a statistical model that predicts the  
24 body mass of moth species from their forewing lengths (with refined parameters for  
25 Crambidae, Erebidae, Geometridae and Noctuidae). We tested the relationships  
26 between biomass, abundance and species richness of samples of moths for our  
27 2018 samples, and over a 16-year period using long-term historical moth data (with  
28 model-estimated biomass) from a single site.

29 3. Modelled biomass was positively correlated with measured biomass of moth  
30 species ( $R^2 = 0.910$ ) and mixed-species samples of moths ( $R^2 = 0.915$ ), showing  
31 that it is possible to predict biomass accurately. Biomass correlated with moth  
32 abundance and species richness in our 2018 data and in the historical dataset,  
33 revealing biomass declined by 65.9 % over a 16-year period.

34 4. By allowing biomass to be estimated for historical moth abundance datasets, our  
35 approach creates opportunities to investigate trends and drivers of insect biomass  
36 change over long timescales and broad geographic regions.

37

38 **Keywords**

39

40 Biodiversity decline, body mass, forewing length, Lepidoptera, moths, predictive model

## 41 **Introduction**

42

43 Several recent studies have reported that insect biomass is in decline (Hallmann *et al.*, 2017;  
44 Lister & Garcia, 2018; Sánchez-Bayo & Wyckhuys, 2019), but with substantial spatial and  
45 taxonomic variation in the existence and strength of such declines (Shortall *et al.*, 2009). The  
46 reasons for such variation are not yet known, and it is therefore possible that declines in  
47 insect biomass are not always symptomatic of equivalent declines in abundance, or vice  
48 versa. Biomass could remain stable even in the face of declining abundance if communities  
49 became increasingly comprised of larger-bodied species. Likewise, changes in community-  
50 level biomass could be attributable to changes in community composition, even in the  
51 absence of an overall abundance change. This might occur if communities became more  
52 biased towards larger- or smaller-bodied species, e.g. through size-bias in strength of  
53 selection for or against particular traits (Coulthard *et al.*, 2019), such as faster or slower life-  
54 histories, degree of habitat specialization (Mattila *et al.*, 2011; Davis *et al.*, 2013), and  
55 strength of attraction to artificial light at night (van Langevelde *et al.*, 2011). However, the  
56 relationships between biomass, abundance and community composition have not yet been  
57 examined at large spatial and temporal scales because of a lack of suitable data on  
58 biomass.

59

60 Opportunities to investigate changes over time and space in insect communities are  
61 provided by several large-scale, long-term abundance datasets for moths (Lepidoptera) in  
62 the UK, including the Rothamsted Insect Survey (RIS; Storkey *et al.*, 2016), the National  
63 Moth Recording Scheme (NMRS; Fox *et al.*, 2011), and the Garden Moth Scheme (GMS;  
64 Bates *et al.*, 2014a; Wilson *et al.*, 2018), and elsewhere (e.g. the *Noctua* database;  
65 Groenendijk & Ellis, 2011). However, these datasets do not record measurements of body  
66 mass, and in most cases do not retain specimens. To address questions of biomass change  
67 using these abundance datasets requires reliable body-mass data for all species, but such  
68 empirical data are currently available for only a limited set of species (García-Barros, 2015).

69 An alternative approach is to use empirical data from a subset of all species to model the  
70 expected body mass of all species from some other, more readily-available, trait. Such  
71 models have previously been formulated to predict the body mass of moths and other  
72 insects from their body length (Sage, 1982) and variants thereof (García-Barros, 2015),  
73 chosen because it is easily measurable from museum specimens (García-Barros, 2015).  
74 However, for moths, body length data are not widely available and in any case may be  
75 influenced to a greater degree by contraction in dried specimens than other traits (García-  
76 Barros, 2015). The only morphological trait for which existing data on many species is  
77 readily available is forewing length: for example, an expected range of forewing lengths is  
78 included for all British species of macro-moths, and most British species of micro-moths, in  
79 standard field guides (Sterling & Parsons, 2012; Waring & Townsend, 2017), and it may  
80 therefore be possible to predict body mass based on forewing length. The existence of  
81 substantial interfamilial variation in body plan (e.g. between Saturniidae and Sphingidae;  
82 Janzen, 1984) may provide opportunities to fine-tune such a model without requiring further  
83 data, but no previous model has included any refinement based on taxonomic relationships  
84 between moths. Therefore, a model to predict body mass based on forewing length, with  
85 family-level refinements where possible, may therefore have the broadest potential  
86 application, but no such model currently exists.

87

88 Two-thirds of British species of macro-moths show negative abundance trends in the long-  
89 term (Conrad *et al.*, 2006), with similar patterns observed elsewhere in Europe (e.g.  
90 Groenendijk & Ellis, 2011). The potential drivers of these declines are diverse (Fox, 2013),  
91 and likely to include habitat loss and fragmentation, agricultural intensification and  
92 associated agrochemical use, increased prevalence of artificial light at night and other  
93 factors associated with urbanisation, and climate change (Wickramasinghe *et al.*, 2004;  
94 Morecroft *et al.*, 2009; Fox, 2013; Fox *et al.*, 2014; Gilburn *et al.*, 2015; van Langevelde *et*  
95 *al.*, 2018). Moths contribute to important ecosystem functions, including nocturnal pollination  
96 (Macgregor *et al.*, 2015, 2019) and energy transfer from producers to higher-level

97 consumers (e.g. Franklin *et al.*, 2003; Hooks *et al.*, 2003; Singer *et al.*, 2012). Thus, moths  
98 can be important to the conservation of their predators, such as bats (Vaughan, 1997;  
99 Threlfall *et al.*, 2012) and some birds (Sierro *et al.*, 2001; Denerley *et al.*, 2018). In  
100 transferring energy, the quantity of vegetation consumed by caterpillars and the biomass of  
101 insects available to predators may be functionally important determinants of ecosystem  
102 processes (Brose *et al.*, 2005). Similarly, the body size of individual species can play a  
103 substantial role in structuring networks of interspecific interactions (Woodward *et al.*, 2005).  
104 Therefore, understanding changes in the biomass of moths at the community level is vital,  
105 requiring biomass data over long time-periods.

106

107 In this study, we develop an approach to estimate the body mass of individual moths from  
108 their forewing length, and hence quantify the biomass of samples of moths. We have three  
109 aims: (i) collection of empirical data (during 2018 on the University of York campus, UK) to  
110 test the relationship between forewing length and body mass in moths; (ii) construction and  
111 testing of a predictive model for estimating body mass from species identity and associated  
112 forewing length; (iii) demonstration of our model's potential applications by investigating  
113 changes over time in biomass, abundance and species richness, using a 16-year historical  
114 abundance dataset (RIS records from the University of York campus during the period 1991-  
115 2006) for which no body mass data or specimens are available.

116

## 117 **Materials and methods**

118

### 119 *Field sampling, identification and measurement of moths*

120

121 We sampled moths at three sites (Fig. S1) on the University of York campus, UK (53°56'41"  
122 N 1°2'2" W) between 11th June and 20th July 2018 (Appendix S1.1). Moths were collected  
123 using Heath-style moth traps (Heath, 1965), each operating a 15 W actinic fluorescent tube  
124 and powered by a 12 V battery (Anglian Lepidopterist Supplies, Hindolveston, UK). Moths

125 were euthanised and returned to the laboratory for identification and measurement. Moths  
126 were identified to species-level where possible using standard field guides (Sterling &  
127 Parsons, 2012; Waring & Townsend, 2017). Where species-level identification would have  
128 required dissection of the genitalia, identification was made to aggregate level (e.g. Common  
129 Rustic agg. *Mesapamea secalis/didyma*). After identification, moths were allowed to air-dry  
130 at room temperature for a minimum of one week (Appendix S1.2, Fig. S2). After drying, we  
131 measured the forewing length and dry mass of each moth. Forewing length was measured  
132 from wing base to wing-tip, using calipers and a ruler, to the nearest 1 mm. Dry mass was  
133 measured using an A&D HR-202 balance (A&D Instruments Ltd., Abingdon, UK), to the  
134 nearest 0.01 mg. Measurements were precise to within  $\pm 6\%$  of the true value (Appendix  
135 S1.2).

136

### 137 *Modelling forewing length – body mass relationship from empirical data*

138

139 To investigate the relationship between forewing length (mm) and body mass (mg; both  
140 variables ln-transformed) in moths, we constructed a generalized linear mixed-effects model  
141 (GLMM) using our 2018 field data, with species as a random effect and the fixed-effect  
142 structure: body mass is explained by the interaction between forewing length and taxonomic  
143 family (i.e.  $\ln(\text{body mass}) \sim \ln(\text{wing length}) \times \text{family}$ ). We tested the significance of model  
144 terms, including the interaction between wing length and family, using Likelihood Ratio  
145 Tests.

146

147 In order to refine the model for making predictions, we then simplified the family variable to  
148 analyse four families which had more than five species in our 2018 samples (Crambidae,  
149 Erebidae, Geometridae and Noctuidae), grouping all other families together as ‘others’ (n = 7  
150 families). This allowed the predictive model’s parameters to be refined for the four families  
151 with sufficient data, whilst also making overall predictions for all other families. We fitted a  
152 GLMM to the dataset as above, using this aggregated version of the family variable, and

153 extracted all parameters from the GLMM to form the predictive model. We did not include  
154 information on whether individuals were male or female, even though male and female  
155 moths can differ substantially in size, because this information is not recorded in historical  
156 abundance datasets. Our model therefore used overall slope and intercept to predict body  
157 mass from forewing length, with a refined slope and intercept for moths from the most  
158 speciose (and therefore data-rich) four families in our dataset.

159

160 To test the accuracy of the predictive model when making predictions based on forewing  
161 length data from field guides, we used it to estimate the dry body mass of every moth in our  
162 dataset. For each moth, we obtained an expected forewing length by taking the midpoint  
163 between the minimum and maximum expected forewing lengths given by field guides (micro-  
164 moths: Sterling & Parsons, 2012; macro-moths: Waring & Townsend, 2017), and applied our  
165 predictive model to these expected forewing lengths to generate estimated body masses  
166 that were independent of our empirical data. From these estimated body masses, we  
167 calculated the total estimated biomass of each sample of moths (i.e. all moths captured at  
168 one site in one night) in our study, and compared this estimate with the true biomass of the  
169 same samples that we had measured. We also calculated the mean dry body mass of each  
170 moth species in our dataset. At both species- and sample-level, we tested the relationship  
171 between measured and predicted biomass, using model II regressions with a Major Axis  
172 approach because neither biomass variable was dependent upon the other. Significance of  
173 relationships from random was tested using one-tailed permutation tests (with 100  
174 permutations), and relationships were also compared to the desired 1:1 (i.e. estimated =  
175 measured) relationship by calculation of 95% confidence intervals around the estimated  
176 slope and intercept. The strength of the relationships between measured and estimated  
177 biomass at species- and sample-level were determined by model  $R^2$  values.

178

179 *Testing biomass – abundance relationships and trends across samples and over time*

180

181 We investigated the relationships between sample-level biomass, abundance and species  
182 richness across our three study sites in 2018 using sample-level data, and over time using a  
183 16-year historical dataset also collected on the University of York campus. We obtained this  
184 long-term historical abundance data from the Rothamsted Insect Survey (RIS), covering the  
185 period 1991–2006. In the RIS, moths are collected in the same location on every night of the  
186 year using standard-design light-traps operating a 200 W tungsten bulb (Storkey *et al.* 2016).  
187 Samples of moths are identified and counted daily or every few days, generating long-term,  
188 high-temporal resolution abundance data for a fixed site which can reveal site-level trends in  
189 abundance over many years (e.g. Fox *et al.* 2013). An RIS trap, “Heslington”, was operated  
190 between 1991–2006 on the roof of the Department of Biology, University of York (53°56’51”  
191 N 1°3’26” W), at approximately 500 m distance from 2018 sampling site 1 (Fig. S1). This trap  
192 was emptied daily and abundance records are available, but specimens were not stored. We  
193 used our predictive model to estimate the body mass of all British species of macro-moths  
194 and all British species of the micro-moth families Crambidae and Pyralidae (Fig. S3), which  
195 collectively included all species that had ever been recorded in the Heslington trap, and also  
196 provides a useful resource for other users of insect abundance data (Table S1). From these  
197 estimates, we calculated the total annual biomass of moths captured in this trap in each year  
198 from 1991–2006.

199  
200 For the 2018 samples, we used generalised linear mixed-effects models (GLMMs) to  
201 investigate the relationships between sample biomass, abundance, and species richness,  
202 with site as a random effect. We tested significance using a Likelihood Ratio Test. For the  
203 Heslington RIS data, we tested the same relationships (with no random effects) using  
204 generalised linear models (GLMs), testing significance using an F-test. We also confirmed  
205 significance of all relationships using model II regressions with a Major Axis approach, as  
206 above, because it was unclear which variable should be viewed as the independent variable.  
207



208 We used linear regression to test for significant trends over time in biomass, abundance and  
209 species richness in the historical dataset, and checked significance of these trends using  
210 non-parametric Spearman's rank correlation because trends over time might not be linear.  
211 We calculated the absolute change in biomass, abundance and species richness between  
212 1991 and 2006, as a percentage of the 1991 value.

213

214 All statistical analyses were conducted in R version 3.5.0 (R Core Team, 2018) using the  
215 following packages: *lme4* to fit and assess linear mixed-effects models (Bates *et al.*, 2015);  
216 *lmodel2* to conduct model II regressions (Legendre, 2018); and *ggplot2* to plot figures  
217 (Wickham, 2016). All R scripts used in the analysis, and all data except the Heslington RIS  
218 data and its derivatives (which can be obtained independently by application to Rothamsted  
219 Research), are archived online at Zenodo (doi: [10.5281/zenodo.2645026](https://doi.org/10.5281/zenodo.2645026)).

220

## 221 **Results**

222

### 223 *Sampled moths*

224

225 We sampled 614 individual moths in 2018, of which 13 could not be identified beyond family  
226 level. One micro-moth (*Narycia duplicella* [Goeze, 1783], Psychidae) could not be detected  
227 by our balance (and therefore weighed less than 0.005 mg). These 14 individual moths were  
228 excluded from further analyses. The remaining dataset contained exactly 600 individual  
229 moths, representing 94 species from 11 families (Table S2).

230

### 231 *Testing forewing length – body mass relationships in field data*

232

233 Body mass and forewing length were significantly related to each other at both species and  
234 individual levels (Fig. 1), with variation among the eleven families in the slope and intercept  
235 of this relationship ( $\chi^2 = 35.9$ , d.f. = 10,  $P < 0.001$ ; marginal  $R^2 = 0.819$ ) revealing that

236 interfamilial variation in body plan significantly influences the scaling of forewing length to  
237 body mass. To reduce the risk of our model overfitting for families represented by only a few  
238 species in our dataset, we refitted this model with an aggregated family variable, in which  
239 seven families represented by fewer than five species in our dataset were grouped together  
240 as 'other' (effectively reducing the family variable from  $n = 11$  to  $n = 5$ ). The significance of  
241 the model (and almost all of its explained variance) was retained when fitting this simplified  
242 model ( $\chi^2 = 30.7$ , d.f. = 4,  $P < 0.001$ ; marginal  $R^2 = 0.812$ ), resulting in a set of parameters  
243 from which body mass could be predicted based on forewing length (Table 1). All four  
244 families with refined estimates had larger intercepts and shallower slopes than the overall  
245 prediction across the other families (Table 1), implying that within families, body mass may  
246 increase more gradually as forewing length increases than between families.

247

248 We found that our estimates of biomass significantly predicted the measured biomass at  
249 both species- and sample-levels (Fig. 2), even though body mass varied widely both within  
250 and between species (within-species s.d. of body mass = 34.6 mg, between-species s.d. of  
251 body mass = 74.7 mg). At sample-level, the relationship between estimated and measured  
252 biomass was not significantly different a 1:1 relationship (Table 2), with 91.5 % of variation  
253 explained. At species-level, estimated biomass explained 91.0 % of variation, but the  
254 relationship was shallower than the expected 1:1 relationship (Table 2). However, when we  
255 excluded the 34 smallest species (i.e. only included species weighing  $> 15$  mg,  $n = 60$   
256 species), the relationship no longer deviated from a 1:1 relationship, indicating that our  
257 predictive model may slightly overestimate the body mass of very small species of moths.

258

259 *Testing biomass – abundance relationships and trends*

260

261 Amongst the samples of moths collected in 2018 for this study, we found that sample  
262 biomass was significantly predicted by abundance and species richness across the three  
263 study sites (Fig. 3), with the strongest relationship to abundance ( $R^2 = 0.566$ ). These results

264 were qualitatively unchanged and quantitatively similar when the biomass of samples was  
265 estimated from the predictive model (Table S3), illustrating that conclusions drawn from  
266 estimated biomass (rather than direct measurements of biomass) are likely to be robust.  
267 Similarly, both abundance and species richness were strongly correlated with estimated  
268 biomass in the Heslington RIS data, with the strongest relationship between biomass and  
269 abundance ( $R^2 = 0.961$ ).

270

271 Using the Heslington RIS dataset, we found that both abundance and species richness  
272 declined significantly between 1991–2006 (Table 3), but changes were not necessarily linear  
273 (Fig. 4). These declines were matched by a significant decline in biomass of  $445.6 \pm 153.0$   
274 mg per year (i.e. annual reductions of 3.1 % of the total biomass in 1991). Biomass declined  
275 by 65.9 % over the 16-year period.

276

## 277 **Discussion**

278

279 The strong relationship between forewing length and body mass in moths enables prediction  
280 (to a useful level of accuracy) of the biomass of samples of moths when specimens have not  
281 been kept. Data generated using this approach will allow researchers to address pressing  
282 and policy-relevant questions about ongoing declines in insect biomass (Hallmann *et al.*,  
283 2017; Lister & Garcia, 2018; Sánchez-Bayo & Wyckhuys, 2019) using long-term recording  
284 datasets, or to include estimates of moth body mass in comparative studies and trait-based  
285 analyses, despite the general lack of empirical data of this nature (García-Barros, 2015). In  
286 particular, these data will facilitate studies of the relationships between biomass, abundance  
287 and community composition, asking questions such as: do biomass declines indicate a  
288 general decline in the abundance of the majority of species, or a severe decline in the  
289 biomass of a few key species (e.g. Shortall *et al.*, 2009), or a shift in community composition  
290 towards smaller-bodied species, all of the above, or something else entirely?

291

292 *Evaluation of the predictive model's current and future utility*

293

294 Overall, the estimates of body mass calculated using the predictive model's parameters  
295 performed relatively well during testing, with > 90 % of variation in measured biomass  
296 explained by predicted biomass at both species- and sample-levels. Therefore, using  
297 estimated body masses from the model (Table S1) to calculate the combined biomass of  
298 large samples of moths should yield accurate results (for example, when summed to  
299 generate annual totals; c.f. Fig. 4). However, our sampled dataset was only sufficiently data-  
300 rich to allow refined parameter estimates for four families (Crambidae, Erebidae,  
301 Geometridae and Noctuidae). Further improvement of the model's accuracy may be possible  
302 with the collection of additional data on body masses from a greater number of species from  
303 other families. These species are less abundant in moth-trap samples than the dominant  
304 family, Noctuidae, and so collection of sufficient data using field sampling may be  
305 challenging. An alternative may be to use museum collections to measure individuals of a  
306 much wider range of species and families, where methods exist to account for the mass of  
307 entomological pins when taking such measurements (Gilbert, 2011). Taking such an  
308 approach might allow for more data to be collected even from rarely-trapped families (e.g.  
309 Sphingidae), or those which are speciose globally but have few (e.g. Saturniidae) or no (e.g.  
310 Hedylidae) species extant in Britain, thereby allowing for incorporation of family-specific  
311 refinements for every family, even at a global scale. However, inspection of Fig. 1 indicates a  
312 'valley' in the data for the relationship between forewing length and body mass; two parallel  
313 relationships indicating two "ways to be a moth" (Janzen, 1984), whereby different moth  
314 families may have substantially different body-plans. For example, the Noctuidae generally  
315 have high body mass for a given forewing length, while Geometridae might have lower body  
316 mass for the same forewing length. In some cases it may, therefore, be sufficient to identify  
317 which relationship is appropriate for a given family, rather than to derive a separate  
318 relationship for every family. Such refinement could potentially be supported by a  
319 phylogenetic imputation approach (Penone *et al.*, 2014). However, in some families (most

320 notably Erebidae), species are distributed across both parallel relationships with little  
321 obvious influence of phylogeny, and so it may be necessary to identify which “way to be a  
322 moth” is most relevant at genus- or even species-level.

323

324 One source of potential error when using published forewing lengths to estimate biomass is  
325 that 19% of individuals in our 2018 dataset had a measured forewing length which was  
326 outside the expected range given by field guides. Nevertheless, there was an overall  
327 correlation ( $R^2 = 0.942$ ) between the mean forewing length at species-level derived from our  
328 2018 empirical measurements and the midpoint of the range of forewing lengths for each  
329 species, taken from the published field guides (Fig. S4). This suggests sufficient accuracy in  
330 our approach, particularly considering that our largest measured species, *Laothoe populi*  
331 (Sphingidae) had a forewing length 524 % larger than that of our smallest species, *Eudonia*  
332 *pallida* (Crambidae).

333

334 An alternative source of possible error in our models is sexual dimorphism in moths. Some  
335 moth species, including some sampled in our study (e.g. Drinker *Euthrix potatoria*;  
336 Lasiocampidae), exhibit substantial sexual dimorphism in wing length (Waring & Townsend,  
337 2017) and in body mass (Allen *et al.*, 2011). However, we did not quantify or adjust for  
338 sexual dimorphism in this study because long-term recording schemes rarely include  
339 information on sex of individual moths, even for dimorphic species, although the majority of  
340 such records are likely to be males (Altermatt *et al.*, 2009). Therefore, for estimation of  
341 sample-level biomass, it will be of most use to provide a single average estimate of body  
342 mass per species, regardless of size dimorphism.

343

344 *Future research using our predictive model to study biomass change*

345

346 The fact that sample biomass correlated strongly with moth abundance, and that both  
347 declined over time in the Heslington RIS dataset (abundance: absolute decline of 56.5 %

348 between 1991 and 2006; biomass: absolute decline of 65.9 % over the same period), is  
349 consistent with other studies showing insect biomass declines in recent decades (Hallmann  
350 *et al.*, 2017; Lister & Garcia, 2018; Sánchez-Bayo & Wyckhuys, 2019). However, questions  
351 remain regarding temporal, spatial, and taxonomic variation in these declines (Shortall *et al.*,  
352 2009), the potential drivers of declines (Grubisic *et al.*, 2018; Komonen *et al.*, 2019), and the  
353 challenges of extrapolating across data types, geographic locations, and temporal and  
354 spatial scales (Thomas *et al.*, 2019; Wagner, 2019). Our study illustrates the power of  
355 predictive models of body mass to tackle these challenges. Applying our estimates of body  
356 mass to RIS datasets across the UK (Storkey *et al.*, 2016), or to other long-term moth  
357 abundance datasets, such as the National Moth Recording Scheme or the Garden Moth  
358 Scheme (Fox *et al.*, 2011; Bates *et al.*, 2014a), will facilitate investigation of declines over  
359 longer time-periods and broader geographical scales than has previously been feasible.  
360 Moreover, the same model parameters could be used to estimate body mass of moths in  
361 other databases, including macro-moth recording schemes from other regions (e.g. the  
362 Noctua database; Groenendijk & Ellis, 2011) and micro-moths, which were incorporated into  
363 the NMRS in 2016. This would allow comparison of biomass losses across multiple datasets  
364 at a global scale.

365

366 Declines in biomass and abundance have been identified in some studies (Conrad *et al.*,  
367 2006; Hallmann *et al.*, 2017; Sánchez-Bayo & Wyckhuys, 2019), but the drivers of these  
368 trends have not been identified. Our study is consistent with the hypothesis that changes in  
369 insect biomass correlate with changes in abundance and species richness of insects (Fig. 3).  
370 However, declines in biomass within the 1991–2006 Heslington RIS dataset were greater  
371 than abundance declines, which in turn were greater than species richness declines (Table  
372 3). Thus, estimating biomass of samples has the potential to add to information held in  
373 abundance datasets, such as the RIS. Changes in community composition could also  
374 contribute to biomass loss; investigating changes in biomass over time at continuously-  
375 recorded sites, using our approach, will be important for examining relationships between

376 biomass change and community composition. Similarly, the environmental drivers causing  
377 changes in insect biomass have not been fully established (Fox, 2013), and our approach  
378 will permit their effects to be investigated at a broader scale, in a similar manner to many  
379 studies of changes in abundance (Conrad *et al.*, 2006; Pescott *et al.*, 2015; Wilson *et al.*,  
380 2018).

381

382 Our approach will be of use for conducting trait-based analyses of moths (e.g. van  
383 Langevelde *et al.*, 2018), where it is important that trait data have high precision (Middleton-  
384 Welling *et al.*, 2018). Our predictive model offers a means to estimate body mass  
385 reproducibly, potentially across multiple data sources, using a trait (forewing length) that is  
386 straightforward to measure using basic equipment, and therefore can be robustly applied to  
387 other datasets. Previous trait-based analyses have used forewing length as a proxy for body  
388 size, but we have shown that there is interfamilial variation in this relationship (Fig. 1), which  
389 can be incorporated by using our approach.

390

### 391 *Conclusions*

392

393 We have developed a predictive model to estimate the dry body mass of moths based on  
394 their forewing length, using it to generate body masses for all British species of macro-moth  
395 and demonstrating its potential for use in the investigation of historical changes in biomass  
396 at large temporal and spatial scales. The predictions of sample biomass made by our model  
397 correlated strongly with measured biomass of the same samples ( $R^2 = 0.915$ ). We use these  
398 predicted body masses to show that biomass of moths has declined by 65.9 % at a site in  
399 Britain over a 16-year period between 1991–2006. Our approach unlocks new opportunities  
400 to study trends in moth biomass over time and over large geographic regions.

401

### 402 **Acknowledgements**

403

404 This study was funded by the Department of Biology, University of York, through an internal  
405 grant awarded to C.J.M. We are grateful to collaborators and staff who have contributed data  
406 from the Rothamsted Insect Survey, a BBSRC-supported National Capability.

407

#### 408 **Contribution of authors**

409

410 The study was conceived by C.J.M. and C.D.T., and designed by those authors in  
411 discussion with J.K.H. Field and laboratory work was conducted by R.S.K., who also carried  
412 out the statistical analysis with C.J.M. Data was collected from the Heslington RIS trap by  
413 T.J.C. The first draft of the manuscript was written by R.S.K. and C.J.M., and all authors  
414 contributed to subsequent revisions.

415

416

#### 417 **References**

418 Allen, C.E., Zwaan, B.J. & Brakefield, P.M. (2011) Evolution of sexual dimorphism in the  
419 Lepidoptera. *Annual Review of Entomology*, **56**, 445–464.

420 Altermatt, F., Baumeyer, A. & Ebert, D. (2009) Experimental evidence for male biased flight-  
421 to-light behavior in two moth species. *Entomologia Experimentalis et Applicata*, **130**,  
422 259–265.

423 Bates, A.J., Sadler, J.P., Grundy, D., Lowe, N., Davis, G., Baker, D., *et al.* (2014) Garden  
424 and landscape-scale correlates of moths of differing conservation status: significant  
425 effects of urbanization and habitat diversity. *PLoS ONE*, **9**, e86925.

426 Bates, D., Maechler, M., Bolker, B. & Walker, S. (2015) Fitting linear mixed-effects models  
427 using *lme4*. *Journal of Statistical Software*, **67**, 1–48.

428 Brose, U., Berlow, E.L. & Martinez, N.D. (2005) Scaling up keystone effects from simple to  
429 complex ecological networks. *Ecology Letters*, **8**, 1317–1325.

430 Conrad, K.F., Warren, M.S., Fox, R., Parsons, M.S. & Woiwod, I.P. (2006) Rapid declines of



- 431 common, widespread British moths provide evidence of an insect biodiversity crisis.  
432 *Biological Conservation*, **132**, 279–291.
- 433 Coulthard, E., Norrey, J., Shortall, C. & Harris, W.E. (2019) Ecological traits predict  
434 population changes in moths. *Biological Conservation*, **233**, 213–219.
- 435 Davis, R.B., Öunap, E., Javoš, J., Gerhold, P. & Tammaru, T. (2013) Degree of  
436 specialization is related to body size in herbivorous insects: a phylogenetic confirmation.  
437 *Evolution*, **67**, 583–589.
- 438 Denerley, C., Redpath, S.M., Wal, R. van der, Newson, S.E., Chapman, J.W. & Wilson, J.D.  
439 (2018) Breeding ground correlates of the distribution and decline of the Common  
440 Cuckoo *Cuculus canorus* at two spatial scales. *The Ibis*, **354**, 547.
- 441 Fox, R. (2013) The decline of moths in Great Britain: a review of possible causes. *Insect*  
442 *Conservation and Diversity*, **6**, 5–19.
- 443 Fox, R., Oliver, T.H., Harrower, C., Parsons, M.S., Thomas, C.D. & Roy, D.B. (2014) Long-  
444 term changes to the frequency of occurrence of British moths are consistent with  
445 opposing and synergistic effects of climate and land-use changes. *Journal of Applied*  
446 *Ecology*, **51**, 949–957.
- 447 Fox, R., Randle, Z., Hill, L., Anders, S., Wiffen, L. & Parsons, M.S. (2011) Moths count:  
448 recording moths for conservation in the UK. *Journal of Insect Conservation*, **15**, 55–68.
- 449 Franklin, A.J., Liebhold, A.M., Murray, K. & Donahue, C. (2003) Canopy herbivore  
450 community structure: large-scale geographical variation and relation to forest  
451 composition. *Ecological Entomology*, **28**, 278–290.
- 452 García-Barros, E. (2015) Multivariate indices as estimates of dry body weight for  
453 comparative study of body size in Lepidoptera. *Nota Lepidopterologica*, **38**, 59–74.
- 454 Gilbert, J.D.J. (2011) Insect dry weight: Shortcut to a difficult quantity using museum  
455 specimens. *The Florida Entomologist*, **94**, 964–970.
- 456 Gilburn, A.S., Bunnefeld, N., Wilson, J.M., Botham, M.S., Brereton, T.M., Fox, R., *et al.*  
457 (2015) Are neonicotinoid insecticides driving declines of widespread butterflies? *PeerJ*,  
458 **3**, e1402.

- 459 Groenendijk, D. & Ellis, W.N. (2011) The state of the Dutch larger moth fauna. *Journal of*  
460 *Insect Conservation*, **15**, 95–101.
- 461 Grubisic, M., Grunsven, R.H.A. van, Kyba, C.C.M., Manfrin, A. & Hölker, F. (2018) Insect  
462 declines and agroecosystems: does light pollution matter? *Annals of Applied Biology*, **8**,  
463 e67798.
- 464 Hallmann, C.A., Sorg, M., Jongejans, E., Siepel, H., Hofland, N., Schwan, H., *et al.* (2017)  
465 More than 75 percent decline over 27 years in total flying insect biomass in protected  
466 areas. *PLoS ONE*, **12**, e0185809.
- 467 Heath, J. (1965) A genuinely portable MV light trap. *Entomologist's Record and Journal of*  
468 *Variation*, **77**, 236–238.
- 469 Hooks, C.R.R., Pandey, R.R. & Johnson, M.W. (2003) Impact of avian and arthropod  
470 predation on lepidopteran caterpillar densities and plant productivity in an ephemeral  
471 agroecosystem. *Ecological Entomology*, **28**, 522–532.
- 472 Janzen, D.H. (1984) Two ways to be a tropical big moth: Santa Rosa saturniids and  
473 sphingids. *Oxford Surveys in Evolutionary Biology*, **1**, 140.
- 474 Komonen, A., Halme, P. & Kotiaho, J.S. (2019) Alarmist by bad design: Strongly popularized  
475 unsubstantiated claims undermine credibility of conservation science. *Rethinking*  
476 *Ecology*, **4**, 17–19.
- 477 Langevelde, F. van, Braamburg-Annegarn, M., Huigens, M.E., Groendijk, R., Poitevin, O.,  
478 Deijk, J.R. van, *et al.* (2018) Declines in moth populations stress the need for conserving  
479 dark nights. *Global Change Biology*, **24**, 925–932.
- 480 Langevelde, F. van, Ettema, J.A., Donners, M., WallisDeVries, M.F. & Groenendijk, D.  
481 (2011) Effect of spectral composition of artificial light on the attraction of moths.  
482 *Biological Conservation*, **144**, 2274–2281.
- 483 Legendre, P. (2018) *lmodel2: Model II Regression*. R package version 1.7-3.  
484 <https://CRAN.R-project.org/package=lmodel2>.
- 485 Lister, B.C. & Garcia, A. (2018) Climate-driven declines in arthropod abundance restructure  
486 a rainforest food web. *Proceedings of the National Academy of Sciences of the United*

- 487 *States of America*, **115**, E10397–E10406.
- 488 Macgregor, C.J., Kitson, J.J.N., Fox, R., Hahn, C., Lunt, D.H., Pocock, M.J.O., *et al.* (2019)  
489 Construction, validation, and application of nocturnal pollen transport networks in an  
490 agro-ecosystem: a comparison using light microscopy and DNA metabarcoding:  
491 Constructing nocturnal pollination networks. *Ecological Entomology*, **44**, 17–29.
- 492 Macgregor, C.J., Pocock, M.J.O., Fox, R. & Evans, D.M. (2015) Pollination by nocturnal  
493 Lepidoptera, and the effects of light pollution: a review. *Ecological Entomology*, **40**, 187–  
494 198.
- 495 Mattila, N., Kaitala, V. & Komonen, A. (2011) Ecological correlates of distribution change and  
496 range shift in butterflies. *Insect Conservation and Diversity*, **4**, 239–246.
- 497 Middleton-Welling, J., Wade, R.A., Dennis, R.L.H., Dapporto, L. & Shreeve, T.G. (2018)  
498 Optimising trait and source selection for explaining occurrence and abundance changes:  
499 A case study using British butterflies. *Functional Ecology*, **111**, 543.
- 500 Morecroft, M.D., Bealey, C.E., Beaumont, D.A., Benham, S., Brooks, D.R., Burt, T.P., *et al.*  
501 (2009) The UK Environmental Change Network: Emerging trends in the composition of  
502 plant and animal communities and the physical environment. *Biological Conservation*,  
503 **142**, 2814–2832.
- 504 Penone, C., Davidson, A.D., Shoemaker, K.T., Di Marco, M., Rondinini, C., Brooks, T.M., *et*  
505 *al.* (2014) Imputation of missing data in life-history trait datasets: which approach  
506 performs the best? *Methods in Ecology and Evolution*, **5**, 961–970.
- 507 Pescott, O.L., Simkin, J.M., August, T.A., Randle, Z., Dore, A.J. & Botham, M.S. (2015) Air  
508 pollution and its effects on lichens, bryophytes, and lichen-feeding Lepidoptera: review  
509 and evidence from biological records. *Biological Journal of the Linnean Society*, **115**,  
510 611–635.
- 511 R Core Team. (2018) *R: A language and environment for statistical computing*. R  
512 Foundation for Statistical Computing, Vienna, Austria.
- 513 Sage, R.D. (1982) Wet and dry-weight estimates of insects and spiders based on length.  
514 *The American Midland Naturalist*, **108**, 407–411.

- 515 Sánchez-Bayo, F. & Wyckhuys, K.A.G. (2019) Worldwide decline of the entomofauna: A  
516 review of its drivers. *Biological Conservation*, **232**, 8–27.
- 517 Shortall, C.R., Moore, A., Smith, E., Hall, M.J., Woiwod, I.P. & Harrington, R. (2009) Long-  
518 term changes in the abundance of flying insects. *Insect Conservation and Diversity*, **2**,  
519 251–260.
- 520 Siervo, A., Arlettaz, R., Naef-Daenzer, B., Strebel, S. & Zbinden, N. (2001) Habitat use and  
521 foraging ecology of the nightjar (*Caprimulgus europaeus*) in the Swiss Alps: towards a  
522 conservation scheme. *Biological Conservation*, **98**, 325–331.
- 523 Singer, M.S., Farkas, T.E., Skorik, C.M. & Mooney, K.A. (2012) Tritrophic interactions at a  
524 community level: effects of host plant species quality on bird predation of caterpillars.  
525 *The American Naturalist*, **179**, 363–374.
- 526 Sterling, P. & Parsons, M. (2012) *Field Guide to the Micro-Moths of Great Britain and*  
527 *Ireland*. First Edition. British Wildlife Publishing Ltd, Gillingham.
- 528 Storkey, J., Macdonald, A.J., Bell, J.R., Clark, I.M., Gregory, A.S., Hawkins, N.J., *et al.*  
529 (2016) Chapter One - The Unique Contribution of Rothamsted to Ecological Research at  
530 Large Temporal Scales. In *Advances in Ecological Research* (ed. by Dumbrell, A.J.,  
531 Kordas, R.L. & Woodward, G.). Academic Press, pp. 3–42.
- 532 Thomas, C.D., Jones, T.H. & Hartley, S.E. (2019) “Insectageddon”: A call for more robust  
533 data and rigorous analyses. *Global Change Biology*, doi: 10.1111/gcb.14608.
- 534 Threlfall, C.G., Law, B. & Banks, P.B. (2012) Sensitivity of insectivorous bats to urbanization:  
535 Implications for suburban conservation planning. *Biological Conservation*, **146**, 41–52.
- 536 Vaughan, N. (1997) The diets of British bats (Chiroptera). *Mammal Review*, **27**, 77–94.
- 537 Wagner, D.L. (2019) Global insect decline: Comments on Sánchez-Bayo and Wyckhuys  
538 (2019). *Biological Conservation*, doi: 10.1016/j.biocon.2019.03.005.
- 539 Waring, P. & Townsend, M. (2017) *Field Guide to the Moths of Great Britain and Ireland*. 3rd  
540 Revised Edition. Bloomsbury Natural History.
- 541 Wickham, H. (2016) *ggplot2: Elegant Graphics for Data Analysis*. Springer-Verlag, New  
542 York.

- 543 Wickramasinghe, L.P., Harris, S., Jones, G. & Jennings, N.V. (2004) Abundance and  
544 species richness of nocturnal insects on organic and conventional farms: Effects of  
545 agricultural intensification on bat foraging. *Conservation Biology*, **18**, 1283–1292.
- 546 Wilson, J.F., Baker, D., Cheney, J., Cook, M., Ellis, M., Freestone, R., *et al.* (2018) A role for  
547 artificial night-time lighting in long-term changes in populations of 100 widespread  
548 macro-moths in UK and Ireland: a citizen-science study. *Journal of Insect Conservation*,  
549 **22**, 189–196.
- 550 Woodward, G., Ebenman, B., Emmerson, M., Montoya, J.M., Olesen, J.M., Valido, A., *et al.*  
551 (2005) Body size in ecological networks. *Trends in Ecology & Evolution*, **20**, 402–409.
- 552

553 **Figures and tables**

554 **Figure 1:** Relationship between forewing length (mm) and dry mass (mg). In the top panel,  
555 the mean forewing length and dry mass of each species sampled in the study is shown on  
556 logarithmic axes, with error bars showing standard errors and family indicated by the  
557 combination of point colour and shape. In panel (b), the forewing length and dry mass of  
558 every individual moth sampled in the study is shown on logarithmic axes, with the four most  
559 speciose families in our sample (Crambidae, Erebidae, Geometridae and Noctuidae)  
560 indicated as above by point colour and shape.

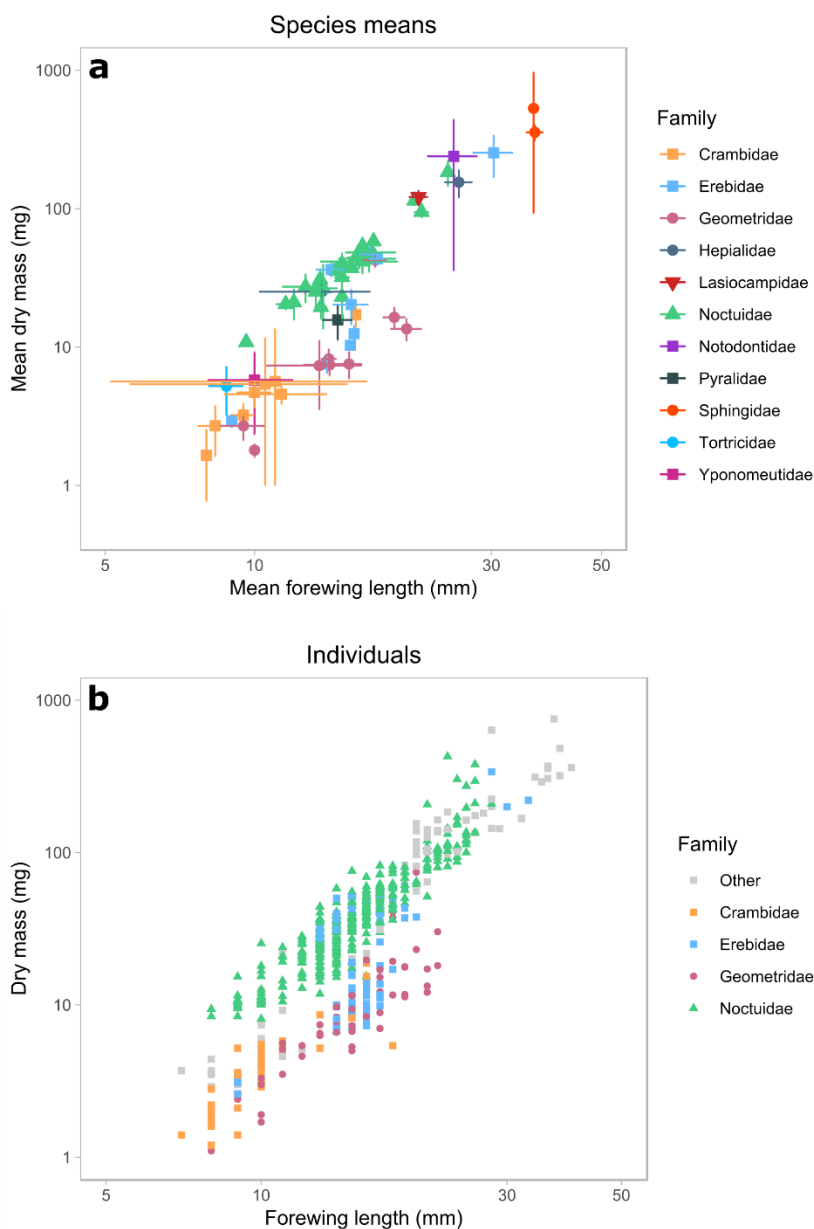

561

562 **Figure 2:** Accuracy of predicted biomass of moth species and samples of moths compared  
563 to the true, measured biomass. (a) Predicted dry mass of species (mg) is plotted against  
564 mean measured dry mass (mg); the 1:1 relationship is plotted as a blue line, and points are  
565 coloured by the number of individual moths from which the measured mean was calculated.  
566 (b) The absolute difference between mean measured dry mass and predicted dry mass of  
567 each moth species is plotted against the number of individuals from which the measured  
568 mean was calculated; a horizontal line is plotted at  $y = 0$ . (c) Predicted dry mass of samples  
569 (mg) is plotted against measured dry mass (mg); the 1:1 relationship is plotted as a blue line,  
570 and points are coloured by the number of individual moths contained in the sample. (d) The  
571 absolute difference between measured and predicted dry mass of each sample of moths is  
572 plotted against measured dry mass (mg); a horizontal line is plotted at  $y = 0$ .  
573

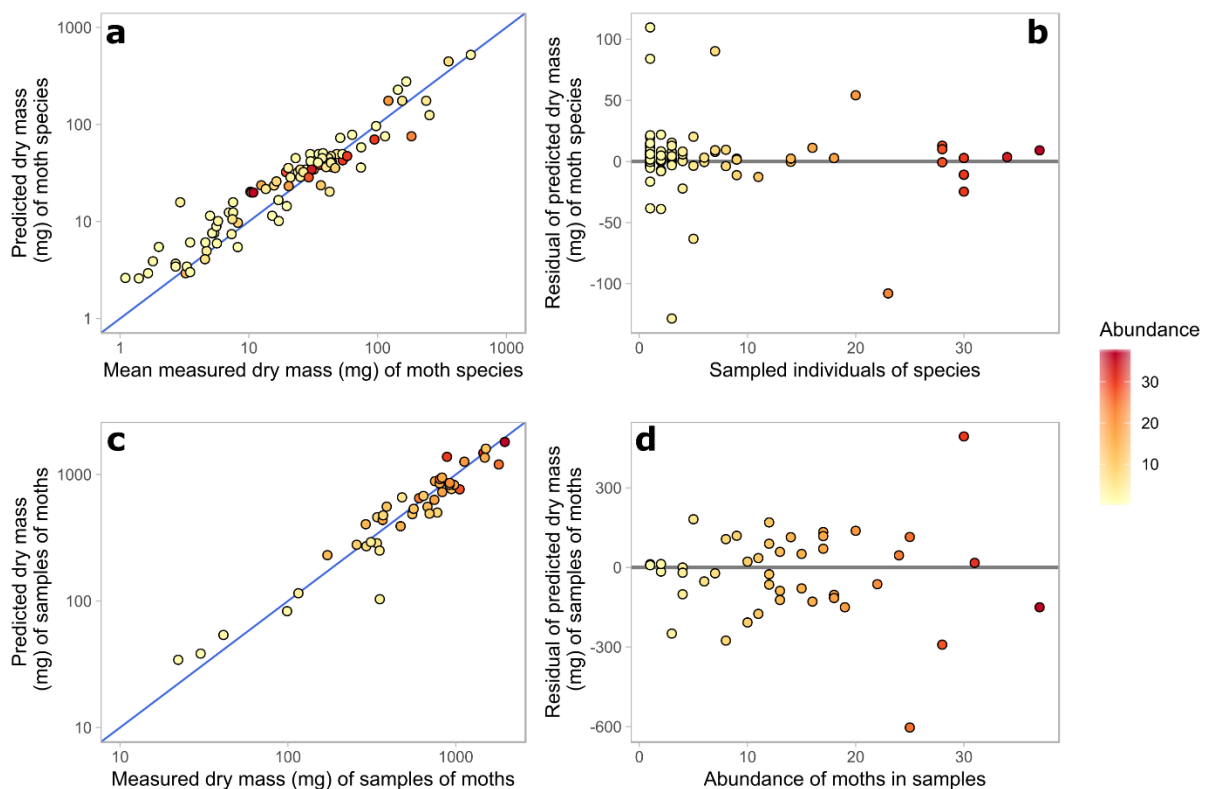

574

575

576 **Figure 3:** Relationship between sample biomass (mg) and abundance and species richness  
577 of moths, for (a,d) measured biomass of samples of moths captured in this study; (b,e)  
578 predicted biomass of samples of moths captured in this study; and (c,f) predicted biomass of  
579 samples of moths recorded in a historical dataset. All relationships are significant ( $P < 0.05$ )  
580 and are plotted as solid lines. Each point represents a single night for the 'sampled moths'  
581 data, whereas historical point samples are much larger, representing year-long totals.  
582

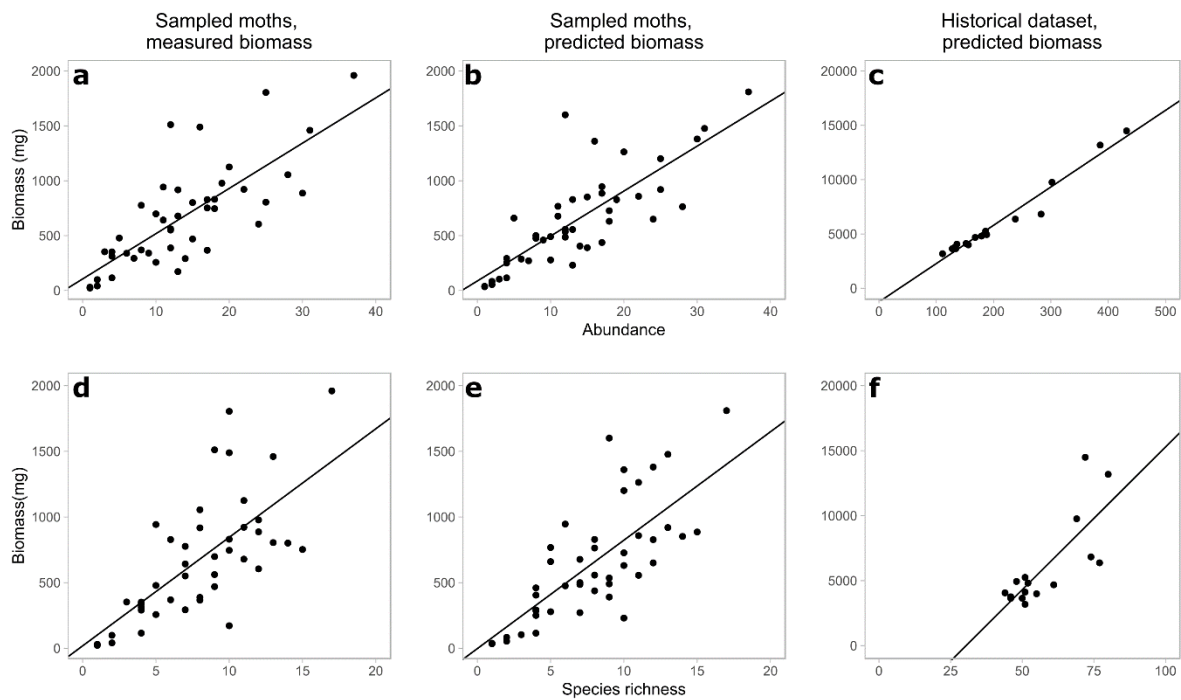

583



584 **Figure 4:** Changes in total biomass (mg), abundance and species richness of moths  
585 captured in the Heslington RIS trap over a 16-year period between 1991 and 2006. All  
586 trends are significant ( $P < 0.05$ ) and are plotted as solid lines (significance of all trends was  
587 also confirmed by a non-parametric Spearman's rank correlation; Table 3).  
588

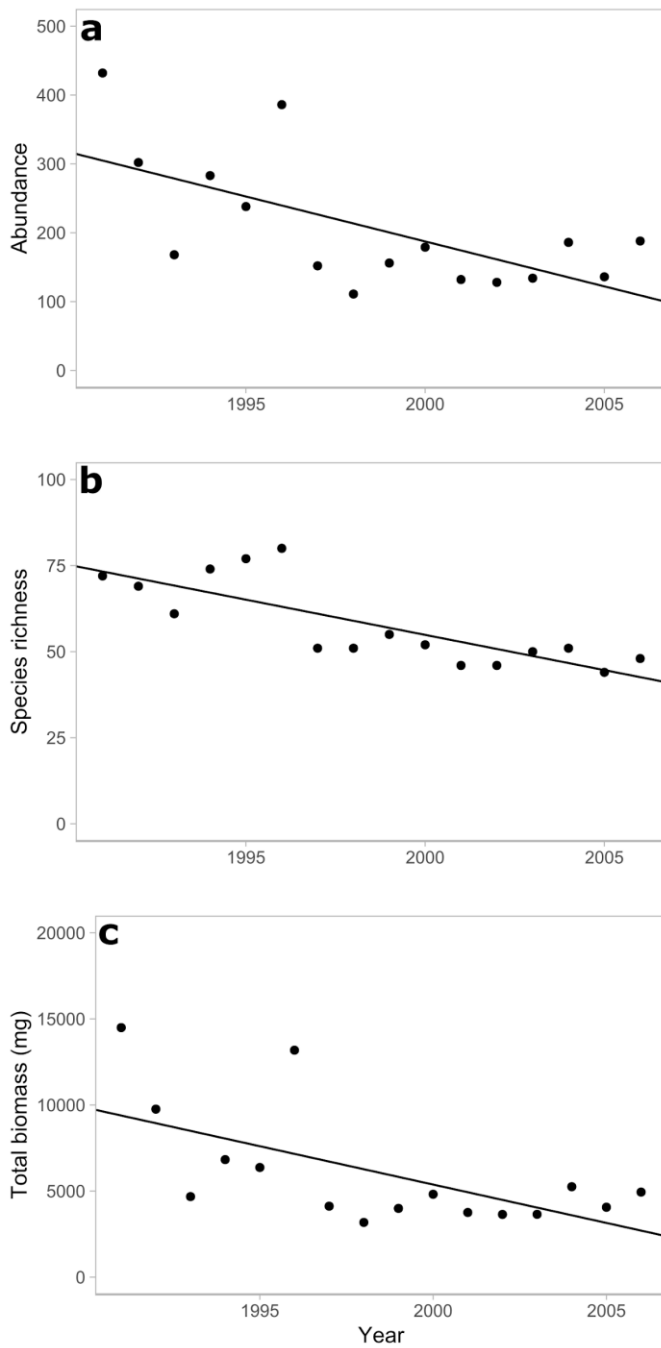

589

590 **Table 1:** Parameters of the predictive model, extracted by fitting a GLMM with the fixed-effects structure:  $\log(\text{body mass}) \sim \log(\text{forewing length})$   
591  $\times$  family, to data from 600 individual moths. Overall model parameters are given, including the  $\chi^2$  and  $P$ -values of a Likelihood Ratio Test of the  
592 model's overall significance. Family-specific slope and intercept values are refinements to be added to the parameters for 'other families'  
593 (rather than taken in isolation). To predict body mass of a moth from its forewing length, these parameters should be applied to the following  
594 formula:  $\log(\text{body mass}) = (\log(\text{forewing length}) \times (\text{'other families' slope} + \text{family slope adjustment})) + (\text{'other families' intercept} + \text{family}$   
595  $\text{intercept adjustment})$ .

596

| Family adjustment                | $n$ species ( $n$ individuals) | $\chi^2$ , d.f. ( $P$ ) | Slope estimate (s.e.) | Intercept estimate (s.e.) |
|----------------------------------|--------------------------------|-------------------------|-----------------------|---------------------------|
| Overall model                    | 94 (600); 11 families          | 30.7, 4 (<0.001)        | -                     | -                         |
| 'Other families' (no adjustment) | 15 (67); 7 families            | -                       | 3.056 (0.180)         | -5.016 (0.540)            |
| Crambidae                        | 11 (38)                        | -                       | -0.904 (0.311)        | 1.361 (0.813)             |
| Erebidae                         | 10 (79)                        | -                       | -0.601 (0.360)        | 1.294 (1.029)             |
| Geometridae                      | 22 (52)                        | -                       | -0.492 (0.322)        | 0.344 (0.891)             |
| Noctuidae                        | 36 (364)                       | -                       | -1.297 (0.239)        | 3.788 (0.694)             |

597

598 **Table 2:** Details of statistical models testing the relationships between measured biomass and estimated biomass at species- and sample-level.  
 599 Relationships were tested using a model II regression, and significance was determined by a one-tailed permutation test with 100 permutations.  
 600 The  $R^2$  of each model is also given, alongside the estimated intercept and slope of each model, with associated 95% confidence intervals.

601

| Level   | Data subset          | <i>n</i> | Model $R^2$ | Model intercept (95% CI) | Model slope (95% CI) | <i>P</i> |
|---------|----------------------|----------|-------------|--------------------------|----------------------|----------|
| Sample  | Full dataset         | 44       | 0.915       | 0.275 (-0.310, 0.810)    | 0.952 (0.865, 1.047) | 0.010    |
| Species | Full dataset         | 94       | 0.910       | 0.545 (0.369, 0.712)     | 0.877 (0.822, 0.936) | 0.010    |
|         | Species > 15 mg only | 60       | 0.823       | 0.168 (-0.311, 0.595)    | 0.964 (0.853, 1.090) | 0.010    |

602

603

604 **Table 3:** Details of statistical models testing the trends over time in annual measures of estimated biomass, abundance and species richness,  
605 using historical samples recorded from the Heslington RIS trap over the 16-year period 1991–2006. Absolute % change over this period is the  
606 absolute difference between values in 1991 and 2006, given as a percentage of the 1991 baseline value. Trends were tested both with a  
607 parametric linear regression tested using an *F*-test, and a non-parametric Spearman’s rank correlation, because some trends appeared to be  
608 non-linear (Fig. 4). *F*-statistics are shown for linear regressions, and *S*-statistics for Spearman’s rank correlations. The  $R^2$  of each linear  
609 regression model is also given, alongside the effect size, which represents the annual change detected in each metric.

610

| Dependent variable  | Absolute % change | <i>n</i> | <i>S</i> ( <i>P</i> ) | Model $R^2$ | Effect size (s.e.) | <i>F</i> ( <i>P</i> ) |
|---------------------|-------------------|----------|-----------------------|-------------|--------------------|-----------------------|
| Abundance           | -56.48            | 16       | 1046 (0.034)          | 0.401       | -13.05 (4.12)      | 10.05 (0.007)         |
| Species richness    | -33.33            | 16       | 1234 (<0.001)         | 0.611       | -2.05 (0.42)       | 23.6 (<0.001)         |
| Sample biomass (mg) | -65.92            | 16       | 1046 (0.034)          | 0.361       | -445.6 (153.0)     | 8.48 (0.011)          |

611

612
